# Supplementary material for: Morphology-controllable synthesis and enhanced luminescence properties of β-NaLuF4:Ln (Ln = Eu, Tb and Ce/Tb) microcrystals by solvothermal process
Source: Royal Society of Chemistry journal article supplement (doi:10.1039/c2ra20675g), 2012-01-01
Supplement: c2ra20675g.pdf [file c2ra20675g.pdf]

# **Morphology-Controllable Synthesis and Enhanced Luminescence Properties of $\beta$ -NaLuF<sub>4</sub>: Ln (Ln = Eu, Tb and Ce/Tb) Microcrystals by Solvothermal Process**

**Fei He,<sup>a</sup> Na Niu,<sup>a</sup> Zhenguo Zhang,<sup>b</sup> Xiao Zhang,<sup>a</sup> Dong Wang,<sup>a</sup> Ling Bai,<sup>a</sup> Shili Gai,<sup>a</sup> Xingbo Li<sup>a</sup> and Piaoping Yang<sup>\*a</sup>**

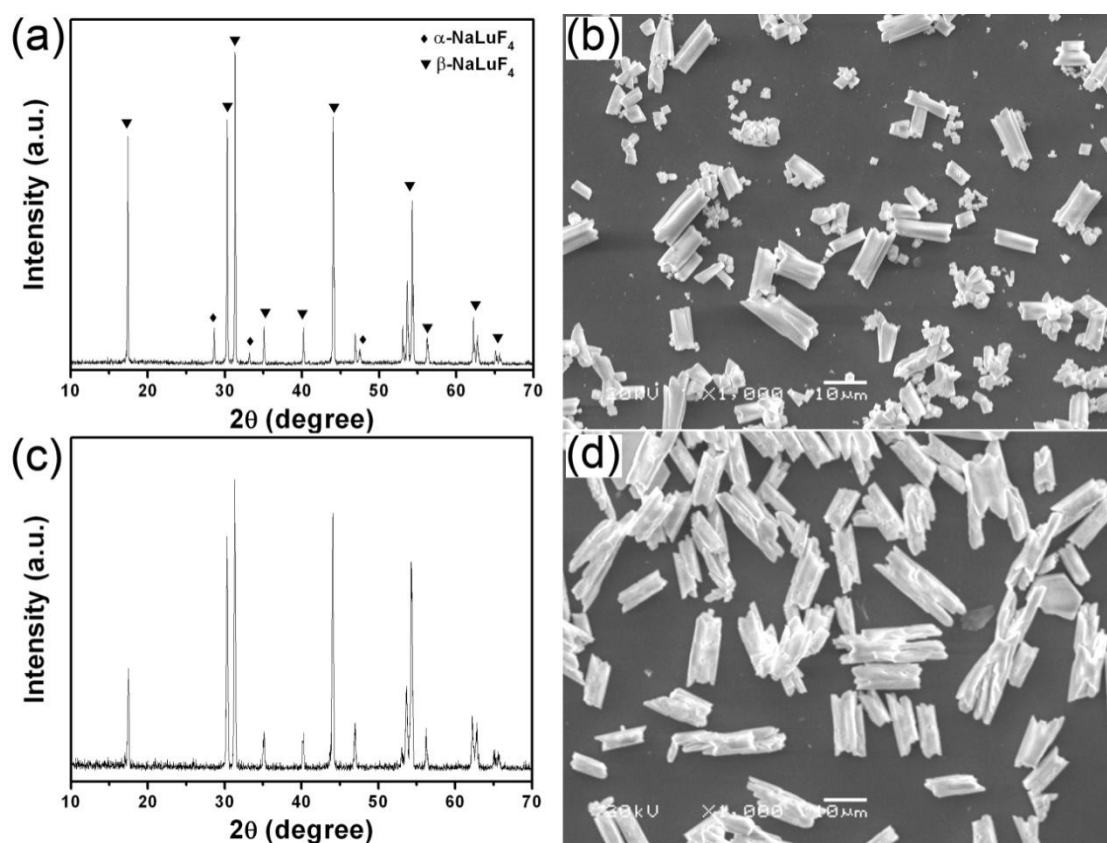

**Fig. S1:** XRD and FESEM results of the samples prepared at 200 °C for 24 h with different mineralizer of Na<sub>2</sub>SO<sub>4</sub> (a) and (b), Na<sub>3</sub>PO<sub>4</sub> (c) and (d). Both samples were obtained with EDA/EG volume ratio of 10/10.
